# Supplementary material for: Cell‐free DNA profiling in retinoblastoma patients with advanced intraocular disease: An MSKCC experience
Source: PubMed Central journal article supplement (PMC7476838; doi:10.1002/cam4.3144), 2020-07-07

Supplementary Figure 1: Variant allele frequencies (VAF) noted in technical replicates from P01, P03, P11, P16 and P19. Figure 1A: Technical replicates analyzed by Waltz genotyper are shown here. Good concordance was noted between the replicates; pearson correlation  $r^2 = 0.993$ . Figure 1B: Technical replicates analyzed by Vardict for *de novo* calls are shown below. Pearson correlation between replicates,  $r^2 = 0.997$ .

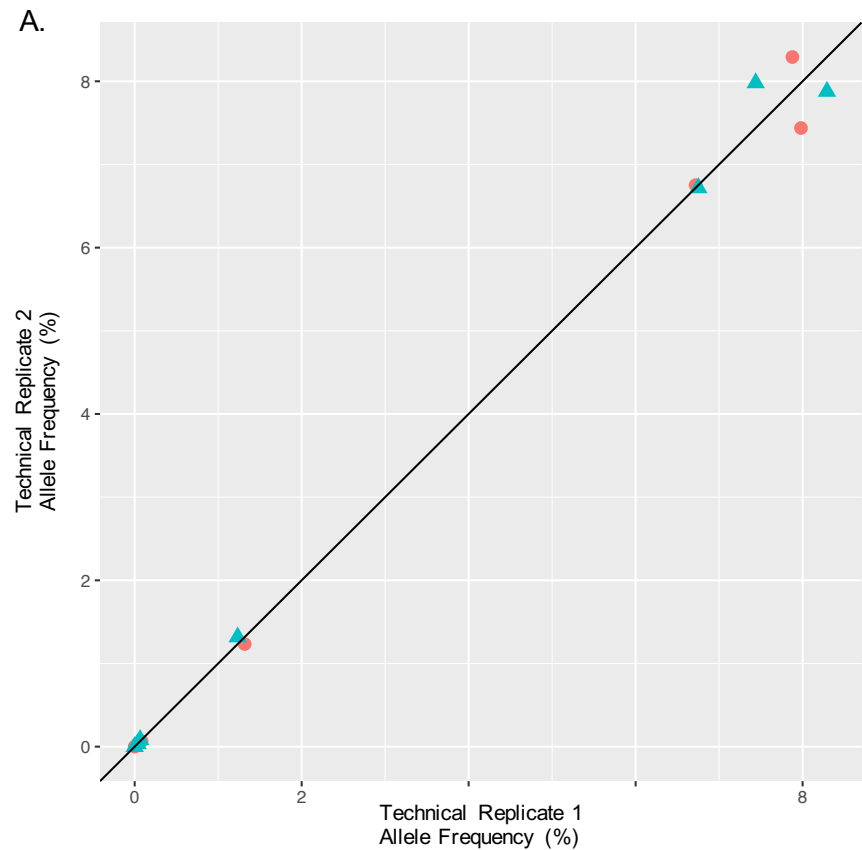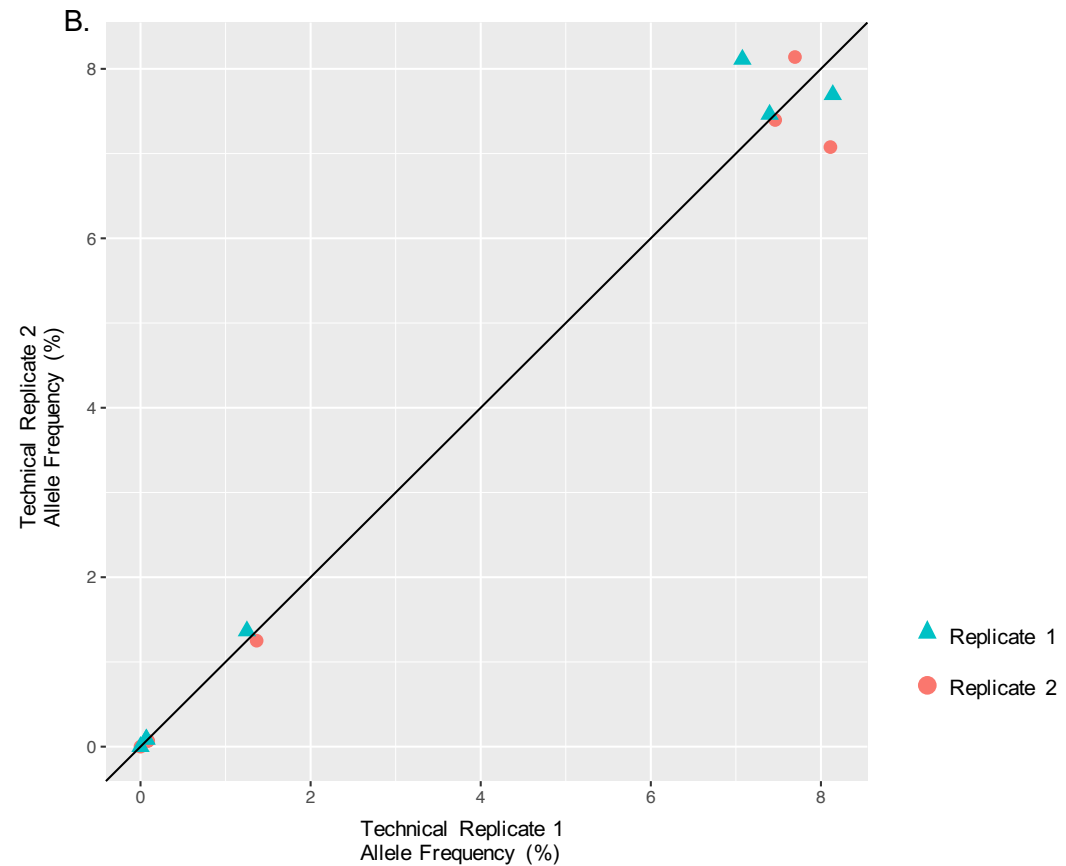

Supplement: CAM4-9-6093-s001.pdf [file CAM4-9-6093-s001.pdf]
